# Supplementary material for: Exploring the immunological role and prognostic potential of PPM1M in pan-cancer
Source: PubMed Central journal article supplement (PMC10036021; doi:10.1097/md.0000000000032758), 2023-03-24
Supplement: medi-102-e32758-s001.pdf [file medi-102-e32758-s001.pdf]

supplementary table 1: the table lists the abbreviations and full names of some tumors, as well as the number of tumor group samples and normal group samples.

| Abbreviations | Full names of the various tumors   | Normal group samples(N) | Tumor group samples(T) |
|---------------|------------------------------------|-------------------------|------------------------|
| KIRC          | kidney renal clear cell cancer     | 72                      | 531                    |
| KIRP          | kidney renal papillary cell cancer | 32                      | 289                    |
| LUAD          | lung adenocarcinoma                | 57                      | 515                    |
| TGCT          | testicular germ cell tumors        | 165                     | 156                    |
| LIHC          | liver hepatocellular cancer        | 50                      | 737                    |
| LUSC          | lung squamous cell carcinoma       | 49                      | 501                    |
| PAAD          | pancreatic adenocarcinoma          | 4                       | 178                    |
| READ          | rectal adenocarcinoma              | 10                      | 167                    |
| SKCM          | skin cutaneous melanoma            | 813                     | 471                    |
| STAD          | stomach adenocarcinoma             | 206                     | 375                    |
| THCA          | thyroid cancer                     | 337                     | 510                    |
