# Supplementary material for: Exploring the immunological role and prognostic potential of PPM1M in pan-cancer
Source: PubMed Central journal article supplement (PMC10036021; doi:10.1097/md.0000000000032758), 2023-03-24

**Supplementary Figure 1:** The decreasing trend of *PPM1M* expression in different WHO stages of pancreatic cancer.

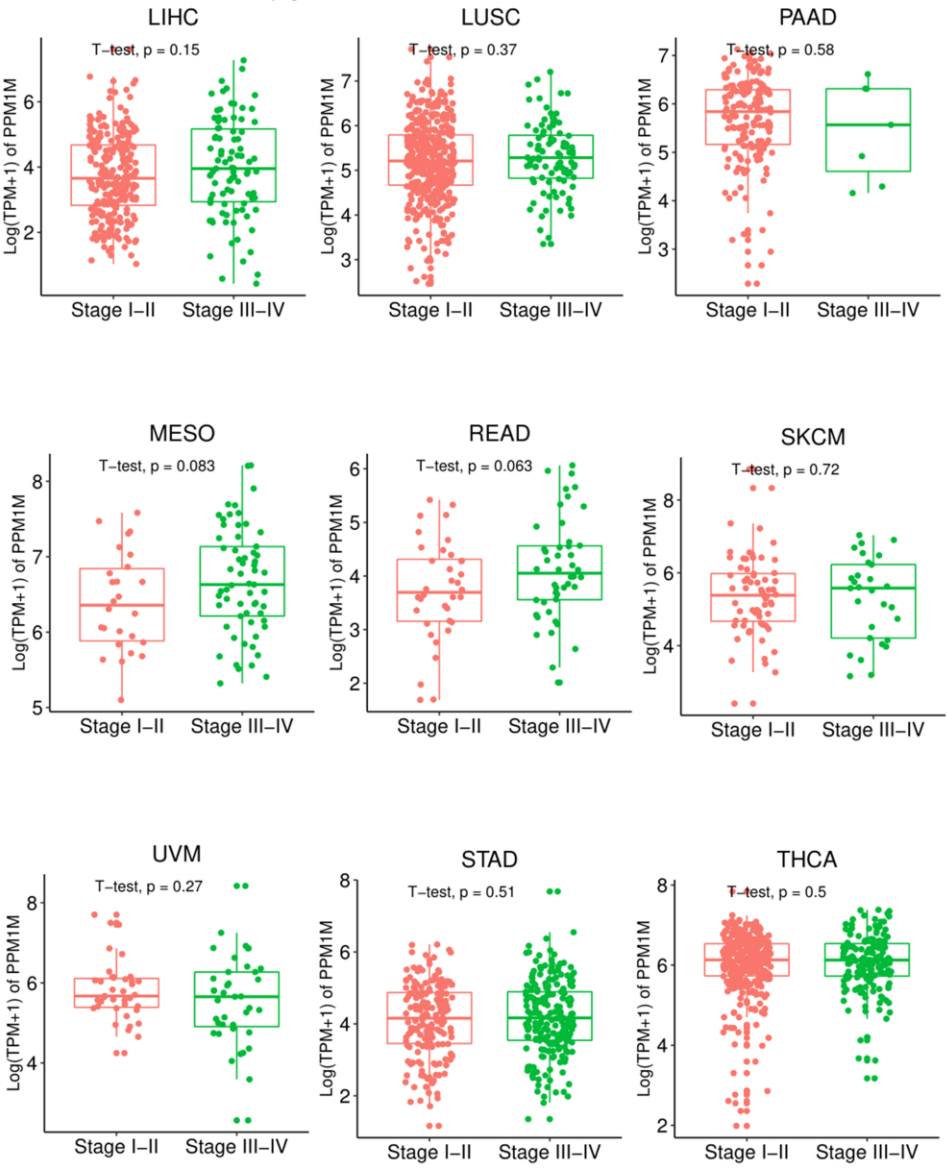

Supplement: medi-102-e32758-s002.pdf [file medi-102-e32758-s002.pdf]
