# Supplementary material for: Exploring the immunological role and prognostic potential of PPM1M in pan-cancer
Source: PubMed Central journal article supplement (PMC10036021; doi:10.1097/md.0000000000032758), 2023-03-24

**Supplementary Figure 2:** The results of correlation analysis of *PPM1M* expression with the estimated immune scores, stromal scores and estimated scores. (A) Estimated immune scores, (B) Stromal scores, (C) Estimated

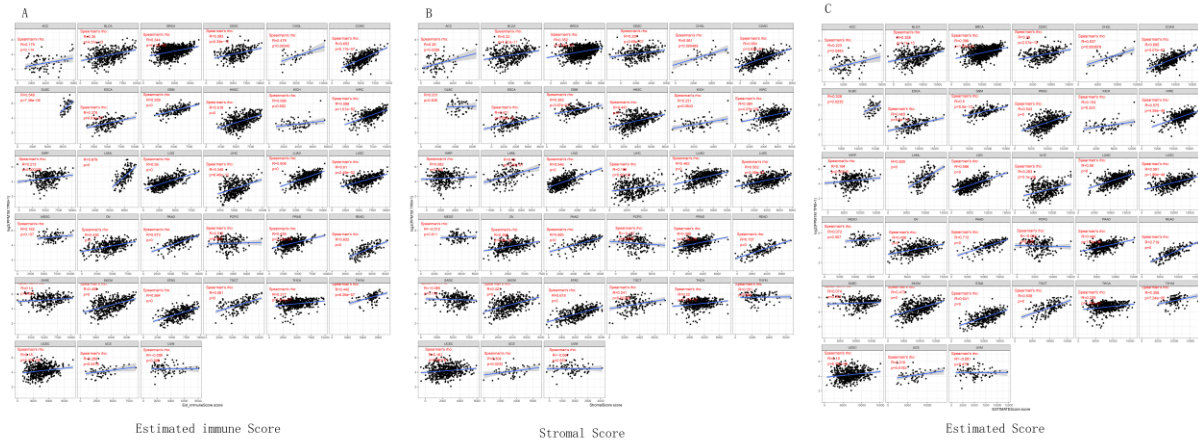

Supplement: medi-102-e32758-s003.pdf [file medi-102-e32758-s003.pdf]
